# Supplementary material for: Insights into research on myocardial ischemia/reperfusion injury from 2012 to 2021: a bibliometric analysis
Source: Springer Nature journal article supplement (doi:10.1186/s40001-022-00967-7), 2023-01-09
Supplement: MOESM1 [file 23903454]

**Table S1** Top 10 co-cited references for MI/R injury research.

| Rank | Co-cited Frequency | First Author      | Title                                                                                                                                                                             | Journal                                              | Year | Column | Page      |
|------|--------------------|-------------------|-----------------------------------------------------------------------------------------------------------------------------------------------------------------------------------|------------------------------------------------------|------|--------|-----------|
| 1    | 325                | Derek J Hausenloy | Myocardial ischemia-reperfusion injury: a neglected therapeutic target                                                                                                            | <i>Journal of Clinical Investigation</i>             | 2013 | 123    | 92-100    |
| 2    | 221                | Borja Ibanez      | Evolving therapies for myocardial ischemia/reperfusion injury                                                                                                                     | <i>Journal of the American College of Cardiology</i> | 2015 | 65     | 1454-1471 |
| 3    | 182                | Gerd Heusch       | Molecular basis of cardioprotection: signal transduction in ischemic pre-, post-, and remote conditioning                                                                         | <i>Circulation Research</i>                          | 2015 | 116    | 674-699   |
| 4    | 177                | Peter Ferdinandy  | Interaction of risk factors, comorbidities, and comedications with ischemia/reperfusion injury and cardioprotection by preconditioning, postconditioning, and remote conditioning | <i>Pharmacological reviews</i>                       | 2014 | 66     | 1142-1174 |
| 5    | 154                | Sean M Davidson   | Multitarget strategies to reduce myocardial ischemia/reperfusion injury: JACC review topic of the week                                                                            | <i>Journal of the American College of Cardiology</i> | 2019 | 73     | 89-99     |
| 6    | 142                | Gerd Heusch       | The pathophysiology of acute myocardial infarction and strategies of protection beyond reperfusion: a continual challenge                                                         | <i>European Heart Journal</i>                        | 2017 | 38     | 774-784   |
| 7    | 141                | Susana Cadenas    | ROS and redox signaling in myocardial ischemia-reperfusion injury and cardioprotection                                                                                            | <i>Free Radical Biology &amp; Medicine</i>           | 2018 | 117    | 76-89     |
| 8    | 136                | Derek J Hausenloy | Ischaemic conditioning and reperfusion injury                                                                                                                                     | <i>Nature Reviews Cardiology</i>                     | 2016 | 13     | 193-209   |
| 9    | 132                | Gerd Heusch       | Cardioprotection: chances and challenges of its translation to the clinic                                                                                                         | <i>Lancet</i>                                        | 2013 | 381    | 166-175   |
| 10   | 126                | Thien-Tri Cung    | Cyclosporine before PCI in patients with acute myocardial infarction                                                                                                              | <i>The New England Journal of Medicine</i>           | 2015 | 373    | 1021-1031 |

Clarivate English Products

Web of Science™ Search Marked List History Alerts Sign In Register

### Search History

Clear History

| Type                   | Search Query and Results                                                                                                                                                                                                                                                                                                                                                                     | Database                                        | Results   | Actions                                 |
|------------------------|----------------------------------------------------------------------------------------------------------------------------------------------------------------------------------------------------------------------------------------------------------------------------------------------------------------------------------------------------------------------------------------------|-------------------------------------------------|-----------|-----------------------------------------|
| <b>Current session</b> |                                                                                                                                                                                                                                                                                                                                                                                              |                                                 |           |                                         |
| Search                 | #4 OR #1 and 2021 or 2020 or 2019 or 2018 or 2017 or 2016 or 2015 or 2014 or 2013 or 2012 (Publication Years) and Articles or Review Articles (Document Types) and English (Languages)<br>7:53 PM                                                                                                                                                                                            | Web of Science Core Collection<br>Show editions | 10,360    | Link Edit Alert Trash                   |
| Search                 | #4 OR #1 and 2021 or 2020 or 2019 or 2018 or 2017 or 2016 or 2015 or 2014 or 2013 or 2012 (Publication Years) and Articles or Review Articles (Document Types)<br>7:53 PM                                                                                                                                                                                                                    | Web of Science Core Collection<br>Show editions | 10,397    | Link Edit Alert Trash                   |
| Search                 | #4 OR #1 and 2021 or 2020 or 2019 or 2018 or 2017 or 2016 or 2015 or 2014 or 2013 or 2012 (Publication Years)<br>7:50 PM                                                                                                                                                                                                                                                                     | Web of Science Core Collection<br>Show editions | 11,514    | Link Edit Alert Trash                   |
| Search                 | #4 OR #1<br>7:49 PM                                                                                                                                                                                                                                                                                                                                                                          | Web of Science Core Collection<br>Show editions | 20,185    | Link Edit Alert Trash <span>39 ?</span> |
| Search                 | #3 AND #2<br>7:48 PM                                                                                                                                                                                                                                                                                                                                                                         | Web of Science Core Collection<br>Show editions | 19,241    | Link Edit Alert Trash                   |
| Search                 | TS=cardiac OR TS=myocardial OR TS=heart<br>7:48 PM                                                                                                                                                                                                                                                                                                                                           | Web of Science Core Collection<br>Show editions | 1,588,023 | Link Edit Alert Trash                   |
| Search                 | TS="ischemia-reperfusion injury" OR TS="ischemia/reperfusion injury" OR TS="ischemia reperfusion injury" OR TS="ischaemia-reperfusion injury" OR TS="ischaemia/reperfusion injury" OR TS="ischaemia reperfusion injury" OR TS="ischemia-reperfusion injuries" OR TS="ischemia/reperfusion injuries" OR TS="ischaemia-reperfusion injuries" OR TS="ischaemia reperfusion injuries"<br>7:47 PM | Web of Science Core Collection<br>Show editions | 46,608    | Link Edit Alert Trash                   |
| Search                 | (TS=("Myocardial reperfusion injury")) OR TS=("Myocardial reperfusion injuries")<br>7:47 PM                                                                                                                                                                                                                                                                                                  | Web of Science Core Collection<br>Show editions | 1,271     | Link Edit Alert Trash                   |

Clarivate™ Accelerating innovation

© 2022 Clarivate Training Portal Product Support

Data Correction Privacy Statement Newsletter

Copyright Notice Cookie Policy Terms of Use

管理 cookie 选项

Follow Us

**Figure S1** Process of searching, retrieving, and selecting potentially relevant studies.
